# Supplementary material
Source: PubMed Central journal article supplement (PMC5137432)
Supplement: supp_gkw744_nar-01633-met-g-2016-File007.pdf [file supp_gkw744_nar-01633-met-g-2016-File007.pdf]

# Single Molecule Tracking Of Ace1p In *Saccharomyces cerevisiae* Defines A Characteristic Residence Time For Non-specific Interactions Of Transcription Factors With Chromatin

David A. Ball<sup>1</sup>, Gunjan D. Mehta<sup>1</sup>, Ronit Salomon-Kent<sup>1</sup>, Davide Mazza<sup>2</sup>, Tatsuya Morisaki<sup>3</sup>, Florian Mueller<sup>4</sup>, James G. McNally<sup>5</sup>, Tatiana S. Karpova<sup>1</sup> \*

## SUPPLEMENTARY MATERIALS AND METHODS

### Strains and plasmids

Diploids homozygous for *in situ* HaloTag fusions and *pdr5Δ* were constructed by mating the appropriate haploids. To construct pTSK405, *TRP1* gene was replaced in pTSK241 (1) with *URA3* SacII/SacI fragment, amplified from yeast genomic DNA by PCR, using oligoes T682 and T683 (see Supplementary Table S2 for all primer sequences). For C-terminal *in situ* fusion to *ACE1*, 3X-GFP was amplified from pTSK405 using primers T695 and T697. To construct pTSK561, NotI-SacII fragment with HaloTag was PCR amplified from pFC15K HaloTag CMVd1 Flexi Vector (Cat. No.: G1601, Promega, USA) using T900 and T901 and inserted into pTSK405, replacing 3x GFP. For C-terminal *in situ* fusions with *URA3* selection, HaloTag was amplified from pTSK561 using T886 and T887 for *HHT1*-HaloTag, or T961 and T962 for *HSF1*-HaloTag, or T695 and T697 for *ACE1*-HaloTag fusions. All the fusions were verified by diagnostic PCR. For *PDR5* deletion, *LoxP-KanMX-LoxP* cassette was amplified from pUG6 (2) using T518 and T519 and transformed into wild-type yeast strain. Transformants were verified by diagnostic PCR.

### Media and growth conditions

Yeast cultures were grown at 30°C unless stated otherwise in YPD or CSM, as described. For SMT, CSM+SC media (CSM+6.5 mg/ml sodium citrate) was used. 200 µg/ml of G418 were added to YPD for *KanMX* marker selection. For growth curves, cells were grown overnight to saturation and then diluted into 50 ml of fresh YPD in 500 ml flask at OD<sub>600</sub> 0.1 and grown with aeration. OD<sub>600</sub> was measured every two hours. For copper sensitivity assay, cells were grown overnight to saturation in CSM, then diluted into fresh CSM, and grown for 6 hrs (until OD<sub>600</sub> reached 0.8 to 1). Ten-fold serial dilutions were made in standard 96 well plate, from which diluted cultures were spotted onto the CSM plates with different concentrations of the CuSO<sub>4</sub> (0 µM, 100 µM, 250 µM, 500 µM) using a Replica Plater (Sigma, USA, Cat. No.: R-2383-1EA). Plates were incubated at 30°C for 48 hrs and images were captured using a standard gel-documentation system. For HS experiments, cells were grown at 25°C. After labeling the log phase cells with HaloTag ligand, cells were concentrated by centrifugation, and resuspended in 25 µl of CSM+SC media in a thin-walled glass tubes (Thermo Scientific, Cat no.: 14-961-26). The tubes were incubated in a 39°C water bath for 15 min before imaging.

### **RNA extraction and quantification by qPCR:**

RNA preparation was performed as described (1). cDNA was prepared using the iScript cDNA synthesis kit (BioRad, Inc. Cat no.: 1708891) starting with 1 mg of total RNA. Quantitative real-time PCR (Q-PCR) was performed as described (1). Primers used for the quantification of *CUP1* are T531 and T532. For normalization of *CUP1* cDNA, the following *TUB1* gene specific primers were used: TUB1F and TUB1R. To confirm the absence of contaminating genomic DNA in cDNA preparations, reverse transcriptase negative (-RT) samples were used as a control, which produced the Ct value difference of  $\geq 15$  cycles between “-RT” and “+RT” samples, indicating negligible amount of genomic DNA contamination in cDNA samples. This experiment was repeated thrice and qPCR was performed in duplicates.

**HILO imaging system** used in these experiments is based on an Olympus IX81 inverted microscope (Olympus Scientific Solutions, Waltham, MA) with a 150x 1.45 NA oil immersion objective lens (UAPON150XOTIRF) and Evolve 512 EMCCD camera (Photometrics, Tucson, AZ). The system has four laser lines: 405 nm (iFLEX-2000, Excelitas Technologies Corp., Waltham, MA), 473 nm (FB-473-500, RGBLase, LLC, Fremont, CA), 561 nm (iFLEX-Mustang, Excelitas Technologies Corp., Waltham, MA), and 647 nm (OBIS 647 LX, Coherent, Inc., Santa Clara, CA). An acousto-optic tunable filter (AOTFnC-400.650, AA Optoelectronic, Orsay, France) is used to select the laser line and control laser power. Microscope and image acquisition are controlled with Micro-manager Open Source Microscopy Software (Open Imaging, Inc, San Francisco, CA).

### **SUPPLEMENTARY REFERENCES**

1. Karpova, T.S., Kim, M. J., Spriet, C., Nalley, K., Stasevich, T. J., Kherrouche, Z., Heliot, L., and McNally, J. G. (2008) Concurrent fast and slow cycling of a transcriptional activator at an endogenous promoter. *Science*, **319**, 466-469.
2. Guldener, U., Heck, S., Fielder, T., Beinhauer, J., and Hegemann, J. H. (1996) A new efficient gene disruption cassette for repeated use in budding yeast. *Nucleic Acids Res.*, **24**, 2519-2524.

## SUPPLEMENTARY TABLES

Supplementary Table 1: List of yeast strains used in this study

| Sr. no. | Strain ID | Genotype                                                                                                                                              |
|---------|-----------|-------------------------------------------------------------------------------------------------------------------------------------------------------|
| 1       | YTK54     | his3-d1 leu2-d0 met15-d0 ura3-d0 cup1-d::LEU2                                                                                                         |
| 2       | YTK82     | his3-d1 leu2-d0 ura3-d0 met15-d0<br>his3-d1 leu2-d0 ura3-d0 lys2-d0                                                                                   |
| 3       | YTK1404   | his3-d1 leu2-d0 met15-d0 ura3-d0 pdr5-d::LoxP-KAN-LoxP ACE1-3xGFP::URA3<br>his3-d1 leu2-d0 lys2-d0 ura3-d0 pdr5-d::LoxP-KAN-LoxP ACE1-3xGFP::URA3     |
| 4       | YTK1414   | his3-d1 leu2-d0 met15-d0 ura3-d0 pdr5-d::LoxP-KAN-LoxP<br>his3-d1 leu2-d0 lys2-d0 ura3-d0 pdr5-d::LoxP-KAN-LoxP                                       |
| 5       | YTK1440   | his3-d1 leu2-d0 met15-d0 ura3-d0 pdr5-d::LoxP-KAN-LoxP HHT1-HaloTag::URA3<br>his3-d1 leu2-d0 lys2-d0 ura3-d0 pdr5-d::LoxP-KAN-LoxP HHT1-HaloTag::URA3 |
| 6       | YTK1446   | his3-d1 leu2-d0 lys2-d0 ura3-d0 pdr5-d::LoxP-KAN-LoxP ACE1-HaloTag::URA3<br>his3-d1 leu2-d0 met15-d0 ura3-d0 pdr5-d::LoxP-KAN-LoxP ACE1-HaloTag::URA3 |
| 7       | YTK1454   | his3-d1 leu2-d0 met15-d0 ura3-d0 HHT1-HaloTag::URA3<br>his3-d1 leu2-d0 lys2-d0 ura3-d0 HHT1-HaloTag::URA3                                             |
| 8       | YTK1479   | his3-d1 leu2-d0 met15-d0 ura3-d0 ACE1-3xGFP::URA3<br>his3-d1 leu2-d0 lys2-d0 ura3-d0 ACE1-3xGFP::URA3                                                 |
| 9       | YTK1486   | his3-d1 leu2-d0 met15-d0 ura3-d0 pdr5-d::LoxP-KAN-LoxP HSF1-HaloTag::URA3<br>his3-d1 leu2-d0 lys2-d0 ura3-d0 pdr5-d::LoxP-KAN-LoxP HSF1-HaloTag::URA3 |
| 10      | YTK1490   | his3-d1 leu2-d0 met15-d0 ura3-d0 ACE1-3xGFP::URA3<br>his3-d1 leu2-d0 lys2-d0 ura3-d0 HHT1-HaloTag::URA3                                               |
| 11      | YTK1491   | his3-d1 leu2-d0 met15-d0 ura3-d0 pdr5-d::LoxP-KAN-LoxP HHT1-HaloTag::URA3<br>his3-d1 leu2-d0 lys2-d0 ura3-d0 pdr5-d::LoxP-KAN-LoxP ACE1-3xGFP::URA3   |
| 12      | YTK1492   | his3-d1 leu2-d0 lys2-d0 ura3-d0 pdr5-d::LoxP-KAN-LoxP ACE1-3xGFP::URA3<br>his3-d1 leu2-d0 met15-d0 ura3-d0 pdr5-d::LoxP-KAN-LoxP                      |

Supplementary Table 2: Primer sequences

| Sr. No. | Primer ID | Description                                                                                          | Sequence                                                                    |
|---------|-----------|------------------------------------------------------------------------------------------------------|-----------------------------------------------------------------------------|
| 1       | T682      | For constructing pTSK405                                                                             | catgccgcggggttaatgtggctgtggt                                                |
| 2       | T683      |                                                                                                      | ccgagagctcgcgtccatctttacagtct                                               |
| 3       | T900      | For amplifying <i>HALO</i> tag from pTSK557 and inserting it between NotI and SacII sites of pTSK405 | catggcggccgccgctgctgccgctgcagctgctgca<br>gctgcgatgggtccgaaatcggactggttcca   |
| 4       | T901      |                                                                                                      | ccgaccgcggtaaccgaaatcctcagagtag                                             |
| 5       | T886      | For C-terminal <i>HALO</i> tagging of <i>HHT1</i>                                                    | tccaaaagaaggatatcaagttggctagaagattaaga<br>ggtgaaagatca caagcggccgccgctgctgc |
| 6       | T887      |                                                                                                      | attgtgttttgttcgtttttactaaaactgatgacaatcaa<br>caaaacta gcgtccatctttacagtct   |
| 7       | T888      | Diagnostic primers for checking <i>HHT1-HALO</i> fusion                                              | ctgttgatcagaaagttgcc                                                        |
| 8       | T889      |                                                                                                      | gcctggctttttcgaggg                                                          |
| 9       | T961      | For C-terminal <i>HALO</i> tagging of <i>HSF1</i>                                                    | aggacccgacagagtacaacgatcaccgcctgcca<br>aacgagctaagaaa caagcggccgccgctgctgc  |
| 10      | T962      |                                                                                                      | ctatattaaatgattatatacgtatttaacaccttgccct<br>gtgtacta gcgtccatctttacagtct    |
| 11      | T798      | Diagnostic primers for checking <i>HSF1-HALO</i> fusion                                              | acctgccaagctttaatgac                                                        |
| 12      | T847      |                                                                                                      | atactatattaaatgattatatacgtatttaacaccttgcc<br>cctgtgta gcgtccatctttacagtct   |
| 13      | T695      | For C-terminal <i>HALO</i> tagging of <i>ACE1</i>                                                    | gttggcagcaaggaagatga                                                        |
| 14      | T697      |                                                                                                      | ggcccgactgccagcttgccgggagacaacaacaacc<br>gccaata gcgtccatctttacagtct        |
| 15      | T695      | Diagnostic primers for checking <i>ACE1-HALO</i> fusion                                              | gttggcagcaaggaagatga                                                        |
| 16      | T701      |                                                                                                      | aatttatccgaatctcggcc                                                        |
| 17      | T518      | For <i>PDR5</i> deletion using pUG6                                                                  | agacaaaaatgcccaggccaagcttaacaataacgt<br>caacgacgctcagctgaagcttcgtacgc       |
| 18      | T519      |                                                                                                      | tcttgagagtttaccgttcttttaggactcttgtaac<br>cagtagacataggccactagtggatctg       |
| 19      | T523      | Diagnostic primers for checking deletion of <i>PDR5</i>                                              | aggccgaaacaagacgtatt                                                        |
| 20      | T524      |                                                                                                      | ggcacagttaagaaataatg                                                        |
| 21      | T531      | For quantification of <i>CUP1</i> transcription by qPCR                                              | catttcccagagcagcatga                                                        |
| 22      | T532      |                                                                                                      | gtcatgagtccaatgcca                                                          |
| 23      | TUB1F     | For quantification of <i>TUB1</i> (reference gene) transcription by qPCR                             | cggtccaagggtatttacg                                                         |
| 24      | TUB1R     |                                                                                                      | tacggcaaatccagcttgg                                                         |

Supplementary Table 3: Concentrations of JF<sub>646</sub> and TMR used in this study

| <b>Protein</b>    | <b>Concentration of JF<sub>646</sub> used for SM tracking</b> | <b>Concentration of TMR used for counter staining of the nuclei</b> |
|-------------------|---------------------------------------------------------------|---------------------------------------------------------------------|
| Hht1p-<br>HaloTag | 0.005 nM                                                      | 100 nM                                                              |
| Ace1p-<br>HaloTag | 0.25 nM                                                       | 1000 nM                                                             |
| Hsf1p-<br>HaloTag | 1 nM                                                          | 1000 nM                                                             |

## SUPPLEMENTARY FIGURES

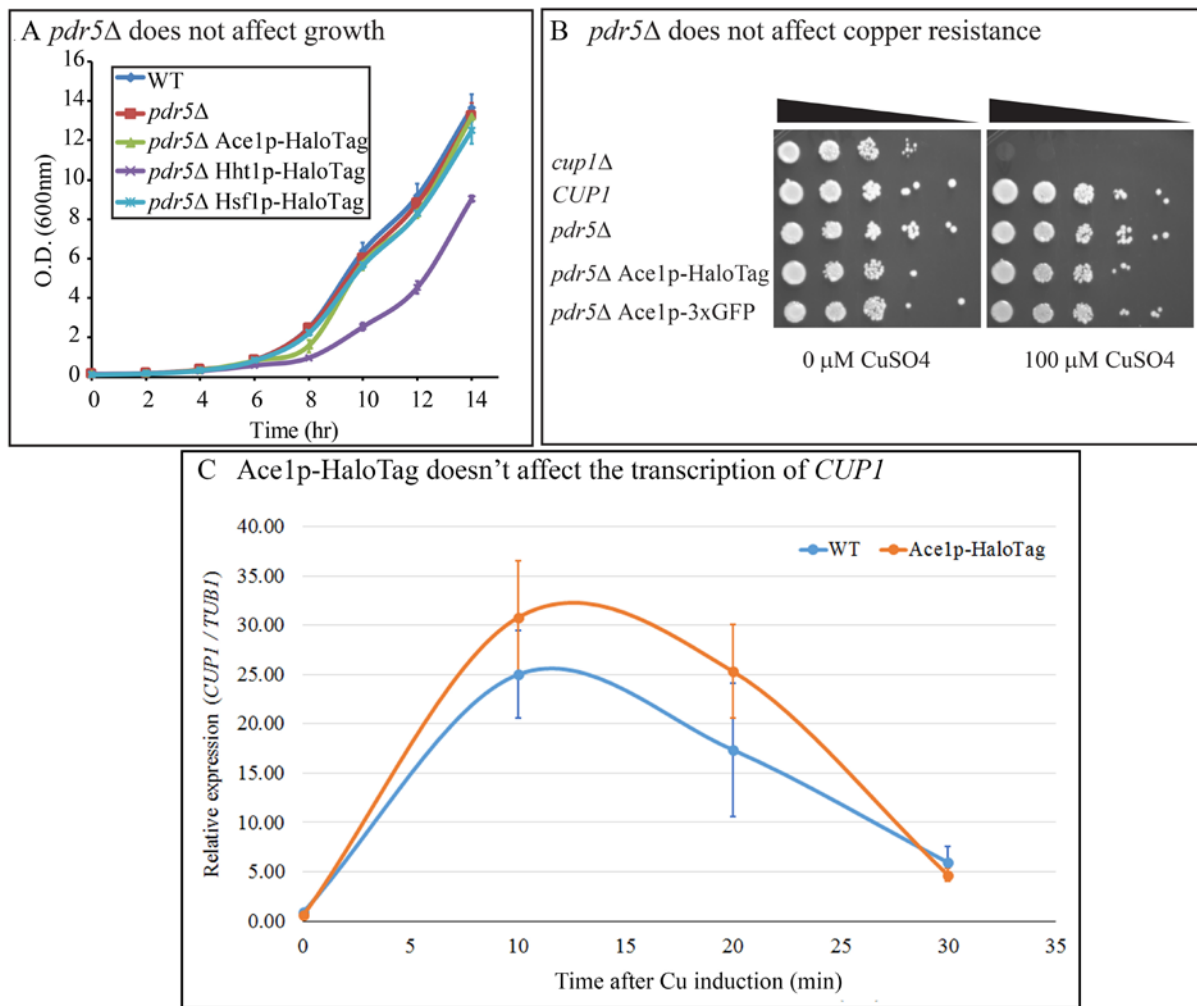

Supplementary Figure S1 Ball et al

Supplementary Figure S1: TMR staining, *pdr5*Δ disruption and HaloTag fusions do not affect growth rate and expression of *CUP1*. (A) Growth curves of WT *PDR5* (YTK82), *pdr5*Δ (YTK1414), *pdr5*Δ Ace1p-HaloTag (YTK1446), *pdr5*Δ Hht1p-HaloTag (YTK1440) and *pdr5*Δ Hsf1p-HaloTag (YTK1486). C-terminal HaloTag fusions of Ace1p and Hsf1p and deletion of *PDR5* had no effect on the growth rate, whereas the growth rate of Hht1p-HaloTag is slightly impeded. Experiment was repeated twice; the error bars represent the standard deviation (s.d.) (B) Growth of progressive dilutions of cell cultures on plates with CuSO<sub>4</sub>. *pdr5*Δ (YTK 1414), *pdr5*Δ Ace1p-HaloTag (YTK1446), and *pdr5*Δ Ace1p-3xGFP (YTK1404) are as resistant to Cu<sup>2+</sup> as *PDR5* (YTK82) at the concentration used for induction of transcription in our tests (100 mM CuSO<sub>4</sub>). Copper-sensitive *cup1*Δ (YTK54) serves as a negative control. (C) Relative quantification of gene expression by RT-PCR shows that Halo tagging of *ACE1* (YTK1446) doesn't affect the transcriptional output from *CUP1* gene; slow cycle of *CUP1* transcription is similar to the wild-type strain (YTK82). Data for *CUP1* are normalized to the expression level of the *TUB1* gene, which does not change in response to copper. Error bars represent standard error of the means (s.e.m) for three independent mRNA extractions.

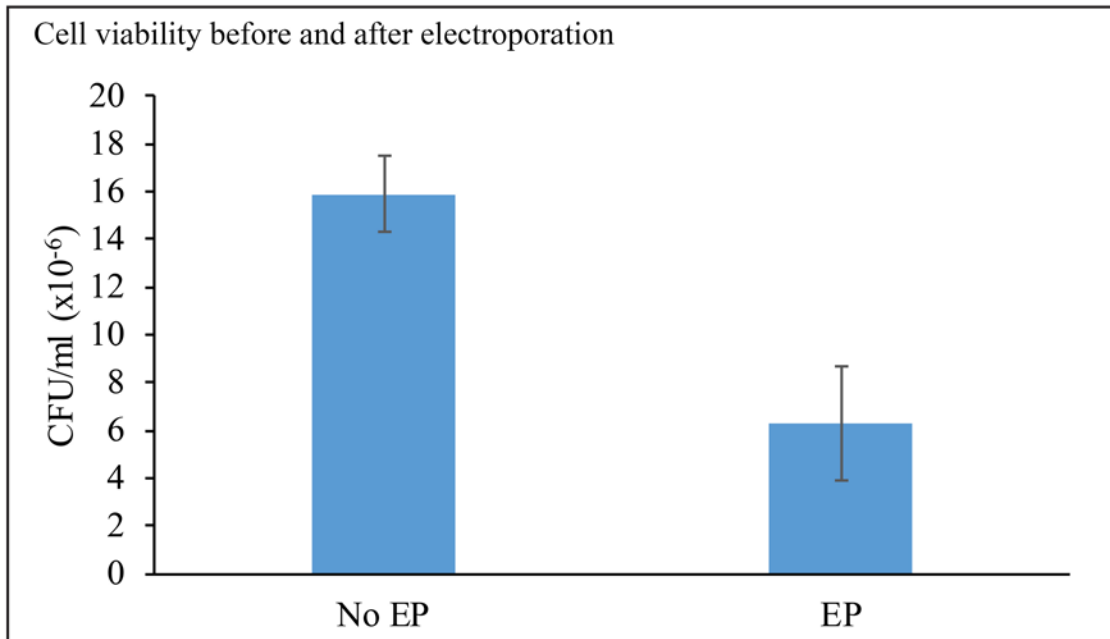

Supplementary Figure S2 Ball et al

Supplementary Figure S2: Cell viability was quantified before and after electroporation using plate assay. 10 times serial dilutions of the cell suspension were spread on YPD agar plates and plates were incubated at 30 °C for 48 hours. Colonies were counted manually and Colony Forming Units (CFU) were calculated per ml of the cell suspension used for electroporation. Experiment was repeated twice and the error bars indicate s.e.m.

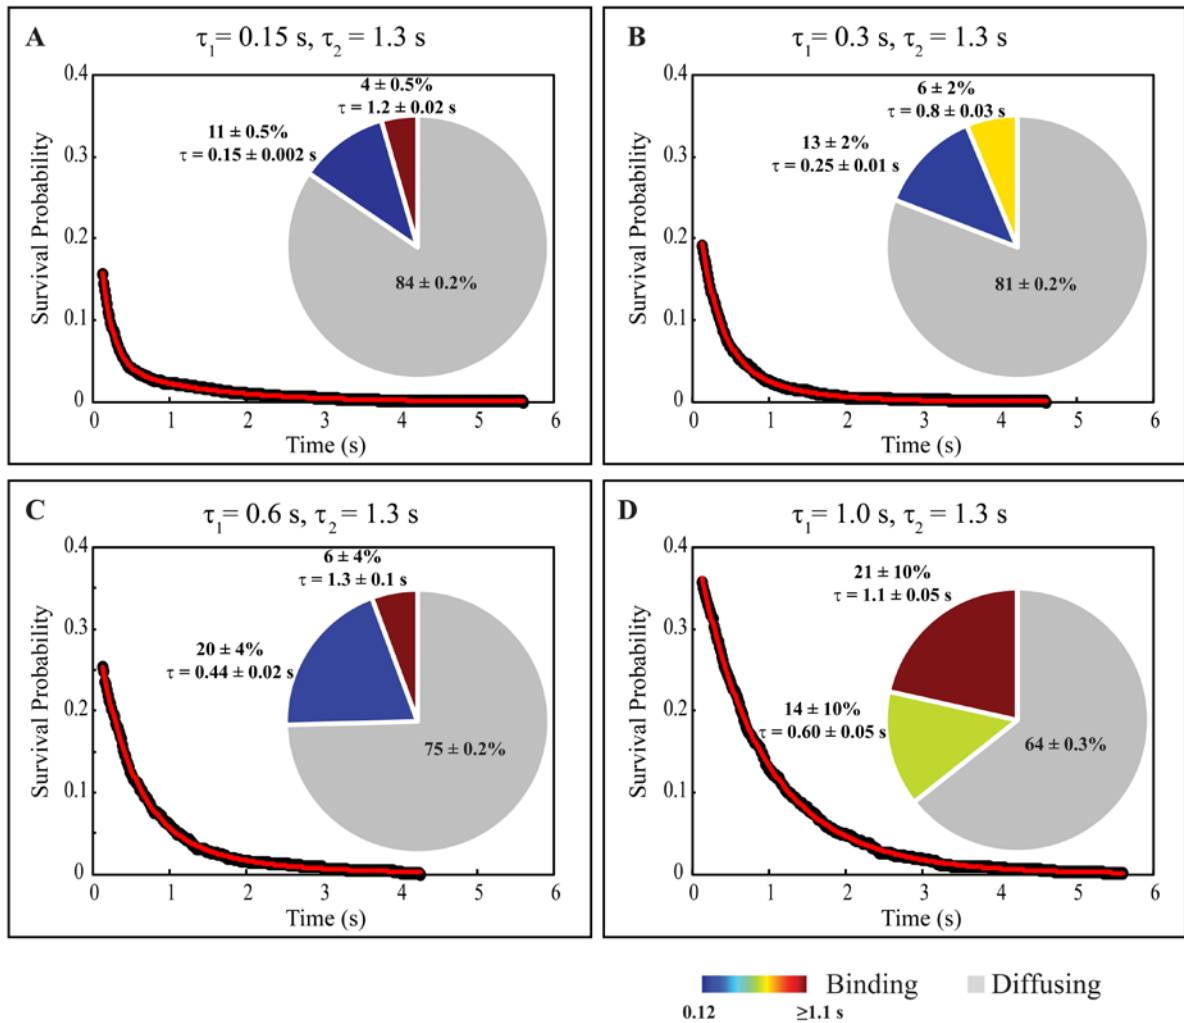

Supplementary Figure S3 Ball et al.

Supplementary Figure S3: Sensitivity of curve fitting to residence time values. Simulations were conducted of 2-component binding to evaluate the performance of the curve fitting by setting the fast binding component's residence time to (A) 0.15 s, (B) 0.3 s, (C) 0.6 s, and (D) 1 s, while keeping the slow binding component's residence time fixed at 1.3 s, and the fraction of the fast component at 85%. Graphs show the survival plot from the simulations (black dots), and the best-fitting two-component exponential (red line). Pie charts show the extracted populations, with the extracted residence times next to the corresponding slices.
